# Supplementary material for: The adsorption of nitrobenzene over an alumina-supported palladium catalyst: an infrared spectroscopic study
Source: Royal Society of Chemistry journal article supplement (doi:10.1039/d3cp03028h), 2023-01-01
Supplement: d3cp03028h1.pdf [file d3cp03028h1.pdf]

## Supporting Information

# The adsorption of nitrobenzene over alumina-supported palladium: an infrared spectroscopic study

Annelouise M. McCullagh,<sup>a</sup> Emma K. Gibson,<sup>a</sup> Stewart F. Parker,<sup>a,b</sup> Keith Refson<sup>b</sup>  
and David Lennon<sup>a\*</sup>

<sup>a</sup>School of Chemistry, Joseph Black Building, University of Glasgow, Glasgow, G12 8QQ, UK.

<sup>b</sup>ISIS Neutron and Muon Facility, STFC Rutherford Appleton Laboratory, Chilton, Oxon OX11 0QX, UK.

Figure S1. Diagram of nitrobenzene with respect to a specified xyz-coordinate (blue = nitrogen; red = oxygen), with the z axis defining the principal component axis of the molecule.

Figure S2. Form of the vibrational modes for a mono-substituted benzene in  $C_{2v}$  symmetry.

Table S1. Approximate wavenumber ranges for the  $\mathcal{M}_i$  vibrations.

Table S2. Vibrational transition energies, infrared intensities, and assignments for nitrobenzene in the solid state as calculated by periodic-DFT.

Table S3. Experimental and calculated geometry of nitrobenzene

Figure S3. Single beam DRIFTS measurement of activated GU-1.

Figure S4. Visualisation of the  $\nu_s(\text{NO}_2)$  and  $\delta_{\text{oop}}(\text{CH})$  nitrobenzene modes during a (a-b) parallel orientation and a (c-d) tilted adsorption orientation over a metal surface with respect to the molecules xz-plane.

Figure S5. Full wavenumber range DRIFTS spectra depicting increasing nitrobenzene exposure (0.62 - 5.58 mmol<sub>(NB)</sub> g<sub>(cat)</sub><sup>-1</sup>) to GU-1. The spectra have been offset by 0.25 au to facilitate viewing.

Figure S6. Nitrobenzene molecule depicting theoretical intra-atomic distances and bond angles derived using the B3LYP method and 6-11G++(3df.2p) basis set.

Figure S7. Diagram visualising nitrobenzene adsorption to Pd(111) in a tilted orientation with respect to the yz-plane depicting a). O positioned in a 2-fold hollow site with H in registry with on-top and b). the H positioned in a 2-fold hollow site with O in registry with the on-top site.

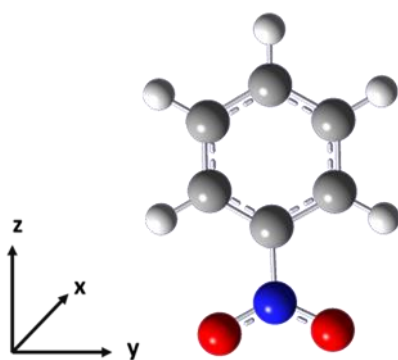

Figure S1. Diagram of nitrobenzene with respect to a specified xyz-coordinate (blue = nitrogen; red = oxygen), with the z axis defining the principal component axis of the molecule.

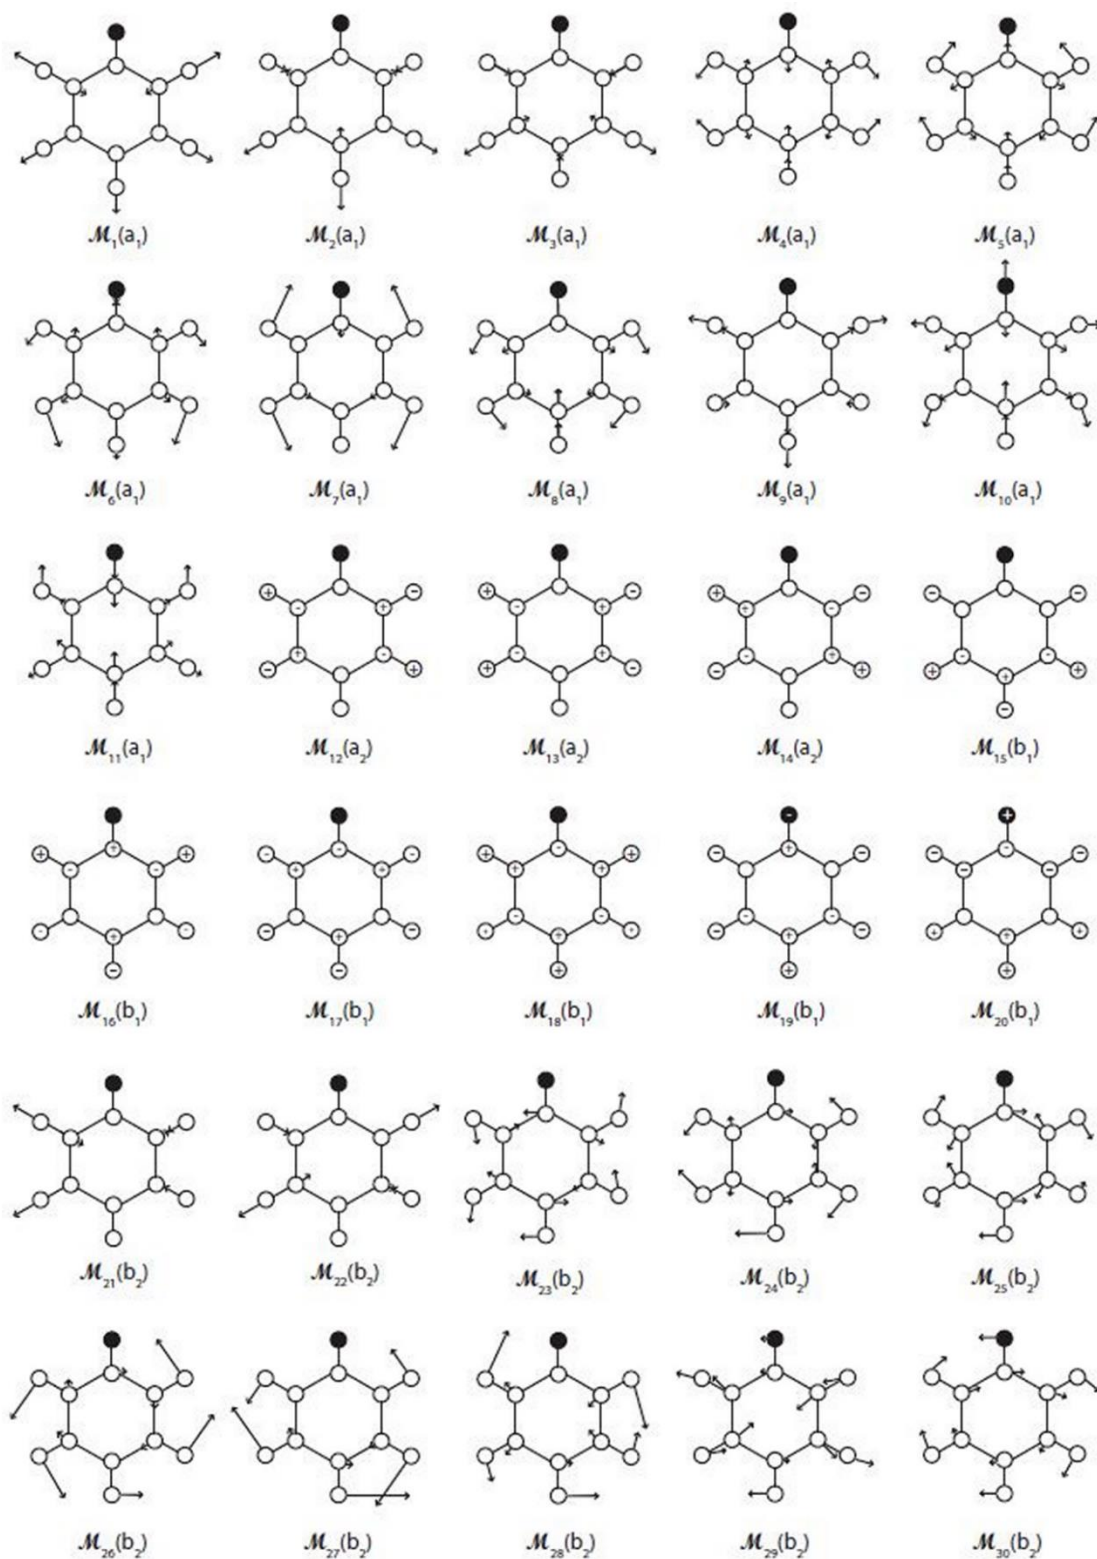

**Figure S2.** Form of the vibrational modes for a mono-substituted benzene in  $C_{2v}$  symmetry as calculated by DFT (B3LYP/aug-cc-pVDZ), labelled using the Gardner and Wright notation. Reproduced from reference [38] with permission of the American Institute of Physics.

**Table S1.** Approximate wavenumber ranges for the  $\mathcal{M}_i$  vibrations. Adapted from reference [38] with permission of the American Institute of Physics.

| Mode number ( $\mathcal{M}$ ) | Symmetry | Wavenumber range / $\text{cm}^{-1}$ |
|-------------------------------|----------|-------------------------------------|
| 1                             | $A_1$    | 3060–3100                           |
| 2                             | $A_1$    | 3040–3090                           |
| 3                             | $A_1$    | 3000–3060                           |
| 4                             | $A_1$    | 1570–1610                           |
| 5                             | $A_1$    | 1460–1510                           |
| 6                             | $A_1$    | 1050–1300                           |
| 7                             | $A_1$    | 1140–1180                           |
| 8                             | $A_1$    | 1010–1040                           |
| 9                             | $A_1$    | 990–1010                            |
| 10                            | $A_1$    | 640–820                             |
| 11                            | $A_1$    | 240–530                             |
| 12                            | $A_2$    | 950–980                             |
| 13                            | $A_2$    | 810–860                             |
| 14                            | $A_2$    | 400–420                             |
| 15                            | $B_1$    | 960–1000                            |
| 16                            | $B_1$    | 870–940                             |
| 17                            | $B_1$    | 710–800                             |
| 18                            | $B_1$    | 670–700                             |
| 19                            | $B_1$    | 410–550                             |
| 20                            | $B_1$    | 160–250                             |
| 21                            | $B_2$    | 3030–3100                           |
| 22                            | $B_2$    | 3020–3070                           |
| 23                            | $B_2$    | 1570–1590                           |
| 24                            | $B_2$    | 1410–1470                           |
| 25                            | $B_2$    | 1310–1340                           |
| 26                            | $B_2$    | 1250–1300                           |
| 27                            | $B_2$    | 1120–1180                           |
| 28                            | $B_2$    | 1060–1090                           |
| 29                            | $B_2$    | 610–630                             |
| 30                            | $B_2$    | 150–410                             |

Table S2. Vibrational transition energies, infrared intensities, and assignments for nitrobenzene in the solid state as calculated by periodic-DFT.

| Freq <sup>a</sup><br>/ cm <sup>-1</sup> | Symm <sup>b</sup> | Infrared<br>intensity<br>/ (D/Å) <sup>2</sup> amu <sup>-1</sup> | Infrared<br>active? | Raman<br>active? | Ave <sup>c</sup><br>/ cm <sup>-1</sup> | Range <sup>d</sup><br>/ cm <sup>-1</sup> | Assignment <sup>e</sup>    |
|-----------------------------------------|-------------------|-----------------------------------------------------------------|---------------------|------------------|----------------------------------------|------------------------------------------|----------------------------|
| 0                                       | Bu                | 0.000                                                           | N                   | N                | 24                                     | 53                                       | Acoustic translation       |
| 0                                       | Bu                | 0.000                                                           | N                   | N                | 36                                     | 60                                       | Acoustic translation       |
| 0                                       | Au                | 0.000                                                           | N                   | N                |                                        |                                          | Acoustic translation       |
| 30                                      | Au                | 0.006                                                           | Y                   | N                |                                        |                                          | Translation                |
| 41                                      | Ag                | 0.000                                                           | N                   | Y                |                                        |                                          | Translation                |
| 43                                      | Bu                | 0.009                                                           | Y                   | N                | 68                                     | 35                                       | Translation                |
| 47                                      | Bg                | 0.000                                                           | N                   | Y                | 54                                     | 11                                       | Libration                  |
| 52                                      | Au                | 0.010                                                           | Y                   | N                |                                        |                                          | Libration                  |
| 53                                      | Bg                | 0.000                                                           | N                   | Y                |                                        |                                          | Translation                |
| 53                                      | Ag                | 0.000                                                           | N                   | Y                |                                        |                                          | Translation                |
| 58                                      | Bu                | 0.560                                                           | Y                   | N                |                                        |                                          | Libration                  |
| 58                                      | Ag                | 0.000                                                           | N                   | Y                |                                        |                                          | Libration                  |
| 60                                      | Bg                | 0.000                                                           | N                   | Y                |                                        |                                          | Translation                |
| 65                                      | Au                | 0.025                                                           | Y                   | N                | 77                                     | 27                                       | Libration                  |
| 73                                      | Ag                | 0.000                                                           | N                   | Y                |                                        |                                          | Translation                |
| 75                                      | Bg                | 0.000                                                           | N                   | Y                |                                        |                                          | Libration                  |
| 77                                      | Bu                | 0.135                                                           | Y                   | N                |                                        |                                          | Libration                  |
| 77                                      | Au                | 0.001                                                           | Y                   | N                |                                        |                                          | Translation                |
| 77                                      | Bg                | 0.000                                                           | N                   | Y                |                                        |                                          | Translation                |
| 82                                      | Au                | 0.330                                                           | Y                   | N                | 91                                     | 23                                       | Libration                  |
| 83                                      | Bu                | 0.255                                                           | Y                   | N                |                                        |                                          | Libration                  |
| 85                                      | Ag                | 0.000                                                           | N                   | Y                | 94                                     | 17                                       | Ph-NO <sub>2</sub> torsion |
| 89                                      | Au                | 0.023                                                           | Y                   | N                |                                        |                                          | Ph-NO <sub>2</sub> torsion |
| 92                                      | Ag                | 0.000                                                           | N                   | Y                |                                        |                                          | Libration                  |
| 93                                      | Bg                | 0.000                                                           | N                   | Y                |                                        |                                          | Libration                  |
| 99                                      | Bu                | 0.013                                                           | Y                   | N                |                                        |                                          | Ph-NO <sub>2</sub> torsion |
| 103                                     | Bg                | 0.000                                                           | N                   | Y                |                                        |                                          | Ph-NO <sub>2</sub> torsion |
| 105                                     | Ag                | 0.000                                                           | N                   | Y                |                                        |                                          | Libration                  |
| 188                                     | Au                | 0.019                                                           | Y                   | N                | 198                                    | 20                                       | $\mathcal{M}20$            |
| 190                                     | Bu                | 0.249                                                           | Y                   | N                |                                        |                                          |                            |
| 207                                     | Bg                | 0.000                                                           | N                   | Y                |                                        |                                          |                            |
| 207                                     | Ag                | 0.000                                                           | N                   | Y                |                                        |                                          |                            |
| 250                                     | Au                | 0.162                                                           | Y                   | N                | 252                                    | 5                                        | $\mathcal{M}30$            |
| 251                                     | Ag                | 0.000                                                           | N                   | Y                |                                        |                                          |                            |
| 252                                     | Bg                | 0.000                                                           | N                   | Y                |                                        |                                          |                            |
| 255                                     | Bu                | 0.098                                                           | Y                   | N                |                                        |                                          |                            |
| 388                                     | Au                | 0.138                                                           | Y                   | N                | 389                                    | 4                                        | $\mathcal{M}11$            |
| 389                                     | Bg                | 0.000                                                           | N                   | Y                |                                        |                                          |                            |
| 390                                     | Bu                | 0.118                                                           | Y                   | N                |                                        |                                          |                            |
| 391                                     | Ag                | 0.000                                                           | N                   | Y                |                                        |                                          |                            |
| 396                                     | Bu                | 0.004                                                           | Y                   | N                | 403                                    | 14                                       | $\mathcal{M}14$            |
| 401                                     | Ag                | 0.000                                                           | N                   | Y                |                                        |                                          |                            |
| 404                                     | Au                | 0.014                                                           | Y                   | N                |                                        |                                          |                            |
| 410                                     | Bg                | 0.000                                                           | N                   | Y                |                                        |                                          |                            |

|      |    |       |   |   |      |    |                                          |
|------|----|-------|---|---|------|----|------------------------------------------|
| 432  | Ag | 0.000 | N | Y | 433  | 4  | $\mathcal{M}19$                          |
| 432  | Bu | 0.179 | Y | N |      |    |                                          |
| 433  | Au | 0.003 | Y | N |      |    |                                          |
| 436  | Bg | 0.000 | N | Y |      |    |                                          |
| 518  | Bg | 0.000 | N | Y | 519  | 2  | NO <sub>2</sub> rock ( $\mathcal{M}30$ ) |
| 518  | Ag | 0.000 | N | Y |      |    |                                          |
| 519  | Bu | 0.440 | Y | N |      |    |                                          |
| 520  | Au | 0.318 | Y | N |      |    |                                          |
| 601  | Au | 0.000 | Y | N | 603  | 4  | $\mathcal{M}29$                          |
| 602  | Bg | 0.000 | N | Y |      |    |                                          |
| 604  | Bu | 0.042 | Y | N |      |    |                                          |
| 605  | Ag | 0.000 | N | Y |      |    |                                          |
| 673  | Bu | 4.637 | Y | N | 675  | 3  | $\mathcal{M}18$                          |
| 673  | Au | 0.582 | Y | N |      |    |                                          |
| 676  | Bg | 0.000 | N | Y |      |    |                                          |
| 676  | Ag | 0.000 | N | Y |      |    |                                          |
| 678  | Au | 0.606 | Y | N | 679  | 2  | $\mathcal{M}10$                          |
| 678  | Bg | 0.000 | N | Y |      |    |                                          |
| 679  | Bu | 0.227 | Y | N |      |    |                                          |
| 680  | Ag | 0.000 | N | Y |      |    |                                          |
| 698  | Bu | 8.052 | Y | N | 704  | 11 | $\mathcal{M}17$                          |
| 705  | Au | 2.887 | Y | N |      |    |                                          |
| 706  | Ag | 0.000 | N | Y |      |    |                                          |
| 709  | Bg | 0.000 | N | Y |      |    |                                          |
| 794  | Au | 0.830 | Y | N | 797  | 6  | NO <sub>2</sub> wag                      |
| 796  | Bu | 0.789 | Y | N |      |    |                                          |
| 799  | Ag | 0.000 | N | Y |      |    |                                          |
| 800  | Bg | 0.000 | N | Y |      |    |                                          |
| 815  | Au | 0.156 | Y | N | 825  | 17 | $\mathcal{M}13$                          |
| 823  | Bg | 0.000 | N | Y |      |    |                                          |
| 827  | Bu | 0.130 | Y | N |      |    |                                          |
| 833  | Ag | 0.000 | N | Y |      |    |                                          |
| 848  | Au | 1.716 | Y | N | 849  | 2  | NO <sub>2</sub> scissors                 |
| 849  | Ag | 0.000 | N | Y |      |    |                                          |
| 849  | Bu | 1.706 | Y | N |      |    |                                          |
| 850  | Bg | 0.000 | N | Y |      |    |                                          |
| 931  | Au | 0.058 | Y | N | 936  | 11 | $\mathcal{M}16$                          |
| 933  | Bu | 0.693 | Y | N |      |    |                                          |
| 941  | Bg | 0.000 | N | Y |      |    |                                          |
| 941  | Ag | 0.000 | N | Y |      |    |                                          |
| 964  | Bu | 0.137 | Y | N | 971  | 13 | $\mathcal{M}12$                          |
| 971  | Ag | 0.000 | N | Y |      |    |                                          |
| 972  | Au | 0.102 | Y | N |      |    |                                          |
| 977  | Bg | 0.000 | N | Y |      |    |                                          |
| 992  | Ag | 0.000 | N | Y | 994  | 4  | $\mathcal{M}9$                           |
| 993  | Bu | 0.379 | Y | N |      |    |                                          |
| 994  | Bg | 0.000 | N | Y |      |    |                                          |
| 996  | Bg | 0.000 | N | Y |      |    |                                          |
| 996  | Au | 0.038 | Y | N | 1000 | 7  | $\mathcal{M}15$                          |
| 1000 | Ag | 0.000 | N | Y |      |    |                                          |

|      |    |        |   |   |      |    |                               |
|------|----|--------|---|---|------|----|-------------------------------|
| 1000 | Au | 0.215  | Y | N |      |    |                               |
| 1003 | Bu | 0.015  | Y | N |      |    |                               |
| 1014 | Ag | 0.000  | N | Y | 1016 | 4  | $\mathcal{M}8$                |
| 1015 | Bu | 0.300  | Y | N |      |    |                               |
| 1017 | Bg | 0.000  | N | Y |      |    |                               |
| 1018 | Au | 0.118  | Y | N |      |    |                               |
| 1071 | Bu | 0.918  | Y | N | 1073 | 6  | $\mathcal{M}28$               |
| 1073 | Au | 3.308  | Y | N |      |    |                               |
| 1073 | Ag | 0.000  | N | Y |      |    |                               |
| 1077 | Bg | 0.000  | N | Y |      |    |                               |
| 1082 | Ag | 0.000  | N | Y | 1086 | 7  | Ph-NO <sub>2</sub> stretch    |
| 1086 | Bg | 0.000  | N | Y |      |    |                               |
| 1087 | Au | 3.632  | Y | N |      |    |                               |
| 1088 | Bu | 4.798  | Y | N |      |    |                               |
| 1146 | Au | 0.032  | Y | N | 1149 | 5  | $\mathcal{M}27$               |
| 1148 | Bu | 0.427  | Y | N |      |    |                               |
| 1151 | Bg | 0.000  | N | Y |      |    |                               |
| 1152 | Ag | 0.000  | N | Y |      |    |                               |
| 1160 | Au | 0.042  | Y | N | 1165 | 9  | $\mathcal{M}7$                |
| 1164 | Ag | 0.000  | N | Y |      |    |                               |
| 1167 | Bg | 0.000  | N | Y |      |    |                               |
| 1169 | Bu | 0.376  | Y | N |      |    |                               |
| 1291 | Bg | 0.000  | N | Y | 1293 | 4  | $\mathcal{M}26$               |
| 1293 | Au | 0.337  | Y | N |      |    |                               |
| 1294 | Ag | 0.000  | N | Y |      |    |                               |
| 1295 | Bu | 0.080  | Y | N |      |    |                               |
| 1310 | Ag | 0.000  | N | Y | 1317 | 14 | N-O <sub>2</sub> sym stretch  |
| 1314 | Au | 33.571 | Y | N |      |    |                               |
| 1318 | Bu | 31.886 | Y | N |      |    |                               |
| 1324 | Bg | 0.000  | N | Y |      |    |                               |
| 1361 | Au | 0.898  | Y | N | 1362 | 3  | $\mathcal{M}25$               |
| 1362 | Bu | 1.849  | Y | N |      |    |                               |
| 1362 | Ag | 0.000  | N | Y |      |    |                               |
| 1364 | Bg | 0.000  | N | Y |      |    |                               |
| 1444 | Ag | 0.000  | N | Y | 1445 | 2  | $\mathcal{M}24$               |
| 1445 | Bu | 0.004  | Y | N |      |    |                               |
| 1445 | Au | 0.048  | Y | N |      |    |                               |
| 1446 | Bg | 0.000  | N | Y |      |    |                               |
| 1460 | Bu | 2.114  | Y | N | 1461 | 1  | $\mathcal{M}5$                |
| 1460 | Ag | 0.000  | N | Y |      |    |                               |
| 1461 | Au | 1.989  | Y | N |      |    |                               |
| 1462 | Bg | 0.000  | N | Y |      |    |                               |
| 1502 | Ag | 0.000  | N | Y | 1506 | 16 | N-O <sub>2</sub> asym stretch |
| 1502 | Au | 10.741 | Y | N |      |    |                               |
| 1503 | Bu | 36.908 | Y | N |      |    |                               |
| 1518 | Bg | 0.000  | N | Y |      |    |                               |
| 1578 | Au | 0.687  | Y | N | 1579 | 3  | $\mathcal{M}4$                |
| 1579 | Bg | 0.000  | N | Y |      |    |                               |
| 1579 | Bu | 1.490  | Y | N |      |    |                               |
| 1580 | Ag | 0.000  | N | Y |      |    |                               |



|      |    |       |   |   |      |   |                 |
|------|----|-------|---|---|------|---|-----------------|
| 1594 | Au | 0.068 | Y | N | 1597 | 6 | $\mathcal{M}23$ |
| 1598 | Ag | 0.000 | N | Y |      |   |                 |
| 1598 | Bg | 0.000 | N | Y |      |   |                 |
| 1600 | Bu | 1.746 | Y | N |      |   |                 |
| 3126 | Bg | 0.000 | N | Y | 3126 | 1 | $\mathcal{M}3$  |
| 3126 | Ag | 0.000 | N | Y |      |   |                 |
| 3126 | Bu | 0.529 | Y | N |      |   |                 |
| 3127 | Au | 0.217 | Y | N |      |   |                 |
| 3133 | Bu | 0.109 | Y | N | 3133 | 1 | $\mathcal{M}22$ |
| 3133 | Au | 0.108 | Y | N |      |   |                 |
| 3134 | Ag | 0.000 | N | Y |      |   |                 |
| 3134 | Bg | 0.000 | N | Y |      |   |                 |
| 3144 | Au | 0.051 | Y | N | 3144 | 1 | $\mathcal{M}2$  |
| 3144 | Bu | 0.058 | Y | N |      |   |                 |
| 3145 | Bg | 0.000 | N | Y |      |   |                 |
| 3145 | Ag | 0.000 | N | Y |      |   |                 |
| 3157 | Bu | 1.123 | Y | N | 3158 | 1 | $\mathcal{M}21$ |
| 3157 | Ag | 0.000 | N | Y |      |   |                 |
| 3158 | Au | 0.300 | Y | N |      |   |                 |
| 3158 | Bg | 0.000 | N | Y |      |   |                 |
| 3160 | Bu | 0.946 | Y | N | 3161 | 0 | $\mathcal{M}1$  |
| 3160 | Au | 1.300 | Y | N |      |   |                 |
| 3161 | Ag | 0.000 | N | Y |      |   |                 |
| 3161 | Bg | 0.000 | N | Y |      |   |                 |

<sup>a</sup>Transition energy.

<sup>b</sup>Symmetry of the factor group component.

<sup>c</sup>Average value of the four factor group components.

<sup>d</sup>Difference between the highest and lowest energy of the four factor group components.

<sup>e</sup>Assignments using the Gardner and Wright  $\mathcal{M}i$  notation [38] (see Figure S2 and Table S1).

**Table S3.** Experimental and calculated geometry of nitrobenzene.<sup>a</sup>

|              | Experimental                                                                                             |                                                                                                                                                                            | Calculated                                                                                                   |                                                                                                          |                                                                                                          |                                                                                                                                                                            |                                                                                                                                                                            |
|--------------|----------------------------------------------------------------------------------------------------------|----------------------------------------------------------------------------------------------------------------------------------------------------------------------------|--------------------------------------------------------------------------------------------------------------|----------------------------------------------------------------------------------------------------------|----------------------------------------------------------------------------------------------------------|----------------------------------------------------------------------------------------------------------------------------------------------------------------------------|----------------------------------------------------------------------------------------------------------------------------------------------------------------------------|
|              | Gas <sup>b</sup>                                                                                         | Solid <sup>b</sup>                                                                                                                                                         | Isolated (Gaus)                                                                                              | Isolated (CASTEP)                                                                                        | Adsorbed (para)                                                                                          | Adsorbed (perp)                                                                                                                                                            | Solid                                                                                                                                                                      |
| Symmetry     | C <sub>2v</sub>                                                                                          | C <sub>1</sub>                                                                                                                                                             | C <sub>2v</sub>                                                                                              | C <sub>2v</sub>                                                                                          | C <sub>s</sub>                                                                                           | C <sub>s</sub>                                                                                                                                                             | C <sub>1</sub>                                                                                                                                                             |
| Distance / Å |                                                                                                          |                                                                                                                                                                            |                                                                                                              |                                                                                                          |                                                                                                          |                                                                                                                                                                            |                                                                                                                                                                            |
| C–C          | C1C2 1.385<br>C2C3 1.401<br>C3C4 1.389                                                                   | C1C2 1.387,<br>C2C3 1.384,<br>C3C4 1.387,<br>C4C5 1.389,<br>C5C6 1.383,<br>C6C1 1.385                                                                                      | C1C2 1.388,<br>C2C3 1.388,<br>C3C4 1.392                                                                     | C1C2 1.394<br>C2C3 1.395<br>C3C4 1.399                                                                   | C1C2 1.459<br>C2C3 1.432<br>C3C4 1.452                                                                   | C1C2 1.402,<br>C2C3 1.392,<br>C3C4 1.399,<br>C4C5 1.400,<br>C5C6 1.392,<br>C6C1 1.402                                                                                      | C1C2 1.396,<br>C2C3 1.392,<br>C3C4 1.398,<br>C4C5 1.397,<br>C5C6 1.391,<br>C6C1 1.395                                                                                      |
| C–N          | 1.468                                                                                                    | 1.465                                                                                                                                                                      | 1.477                                                                                                        | 1.491                                                                                                    | 1.508                                                                                                    | 1.431                                                                                                                                                                      | 1.474                                                                                                                                                                      |
| N–O          | 1.223                                                                                                    | NO1 1.223,<br>NO2 1.229                                                                                                                                                    | 1.221                                                                                                        | 1.224                                                                                                    | 1.228                                                                                                    | NO1(Pd) 1.270<br>NO2 1.260                                                                                                                                                 | NO1 1.229,<br>NO2 1.229                                                                                                                                                    |
| C–H          | C2H 1.069<br>C3H 1.072<br>C4H 1.073                                                                      | C1H 0.931,<br>C2H 0.946<br>C3H 0.954, C4H<br>1.030,<br>C5H 0.904                                                                                                           | C2H 1.079,<br>C3H 1.081,<br>C4H 1.082                                                                        | C2H 1.087<br>C3H 1.088<br>C4H 1.089                                                                      | C2H 1.088<br>C3H 1.089<br>C4H 1.094                                                                      | C1H 1.086,<br>C2H 1.089<br>C3H 1.089, C4H<br>1.089,<br>C5H 1.087                                                                                                           | C1H 1.085,<br>C2H 1.086<br>C3H 1.087, C4H<br>1.086,<br>C5H 1.085                                                                                                           |
| Angle / °    | C1C2C3 117.8<br>C2C3C4 120.3,<br>C3C4C5 120.5,<br>C6C1C2 123.5<br>C2C1N 118.2<br>C1NO 117.9<br>ONO 124.2 | C1C2C3 118.1,<br>C2C3C4 120.2,<br>C3C4C5 120.5,<br>C4C5C6 120.3,<br>C5C6C1 118.1,<br>C6C1C2 122.8<br>C2C1N 118.8<br>C6C1N 118.4<br>C1NO1 118.2<br>C1NO2 118.6<br>ONO 123.2 | C1C2C3 118.5,<br>C2C3C4 120.3,<br>C3C4C5 120.2,<br>C2C1C2 122.3,<br>C2C1N 118.8,<br>C1NO 117.7,<br>ONO 124.7 | C1C2C3 118.5<br>C2C3C4 120.2,<br>C3C4C5 120.3,<br>C6C1C2 122.3<br>C2C1N 118.8<br>C1NO 117.5<br>ONO 125.1 | C1C2C3 121.0<br>C2C3C4 121.9,<br>C3C4C5 116.8,<br>C6C1C2 122.3<br>C2C1N 116.0<br>C1NO 117.6<br>ONO 124.7 | C1C2C3 118.6,<br>C2C3C4 120.5,<br>C3C4C5 120.0,<br>C4C5C6 120.5,<br>C5C6C1 118.6,<br>C6C1C2 121.7<br>C2C1N 119.3<br>C6C1N 118.9<br>C1NO1 118.5<br>C1NO2 119.2<br>ONO 122.3 | C1C2C3 118.4,<br>C2C3C4 120.1,<br>C3C4C5 120.5,<br>C4C5C6 120.2,<br>C5C6C1 118.3,<br>C6C1C2 122.4<br>C2C1N 118.9<br>C6C1N 118.8<br>C1NO1 118.0<br>C1NO2 118.3<br>ONO 123.7 |

|         |     |                                  |     |     |                                                          |     |                                  |
|---------|-----|----------------------------------|-----|-----|----------------------------------------------------------|-----|----------------------------------|
| Planar? | Yes | No, NO <sub>2</sub> 1.7° rotated | Yes | Yes | No, NO <sub>2</sub> and C–H bent away from plane of ring | Yes | No, NO <sub>2</sub> 1.0° rotated |
|---------|-----|----------------------------------|-----|-----|----------------------------------------------------------|-----|----------------------------------|

<sup>a</sup>Symmetry related values are not given

<sup>b</sup>r<sub>e</sub> structure (Table 9 of reference [38])

<sup>c</sup>[32]

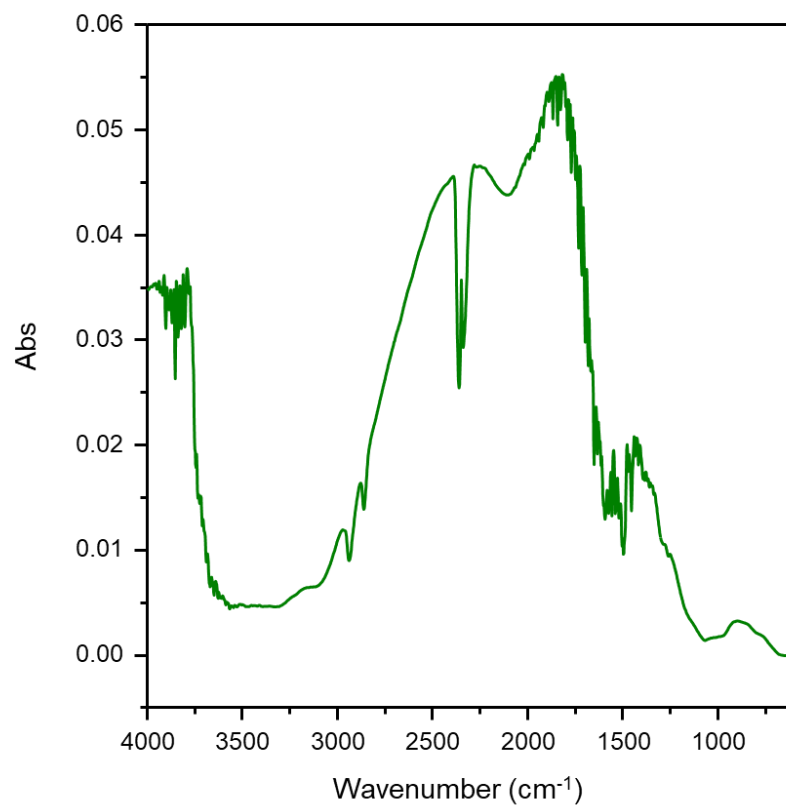

Figure S3. Single beam DRIFTS measurement of activated GU-1.

## Section S1: Nitrobenzene Tilting - $C_s \sigma_v(xz)$ Symmetry

Evidence of differing adsorbate geometry as a function of surface coverage would only be observable for nitrobenzene exhibiting  $C_s \sigma_v(xz)$  symmetry, as observed for a parallel adsorption orientation, and a change of orientation in the molecular  $xz$ -plane. For a parallel orientation of nitrobenzene over a metal surface, the in-plane  $A'$   $\nu_s(\text{NO}_2)$  mode (Figure S4a.) would not be observed, as per the MSSR [12], [14], due to a parallel orientation of the resulting dipole to the metal surface. The perpendicular orientation of the out-of-plane  $A'$   $\delta_{\text{oop}}(\text{CH})$  mode (Figure S4b.) would yield a perpendicularly positioned dipole, and thus would be IR allowed. If the orientation of nitrobenzene was changed in the  $xz$ -plane such that the molecule retained  $C_s \sigma_v(xz)$  symmetry but was now positioned in a titled orientation (Figure S4(c-d).) both the in-plane  $\nu_s(\text{NO}_2)$  and out-of-plane  $\delta_{\text{oop}}(\text{CH})$  modes would be observed. Therefore, spectra would change from presenting solely out-of-plane modes, to all IR allowed modes.

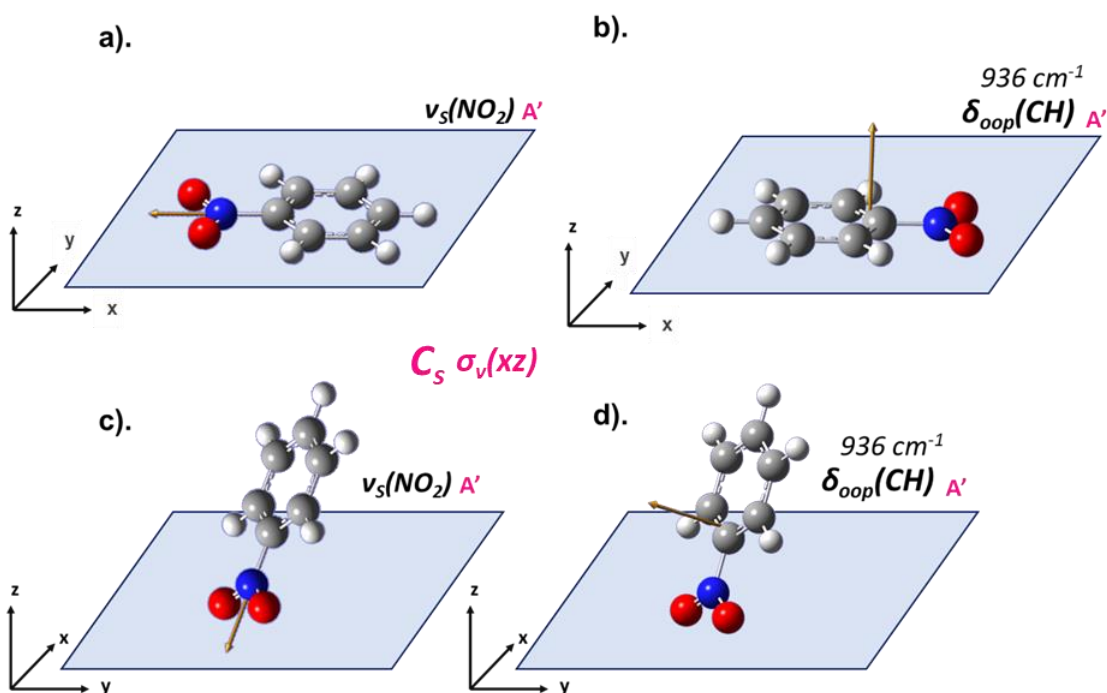

**Figure S4.** Visualisation of the  $\nu_s(\text{NO}_2)$  and  $\delta_{\text{oop}}(\text{CH})$  nitrobenzene modes during (a-b) a parallel orientation and (c-d) a tilted adsorption orientation over a metal surface with respect to the molecules  $xz$ -plane. Orange arrows indicate the dipole derivative unit vector associated with each mode. Grey parallelograms symbolise a non-specific Pd crystallite.

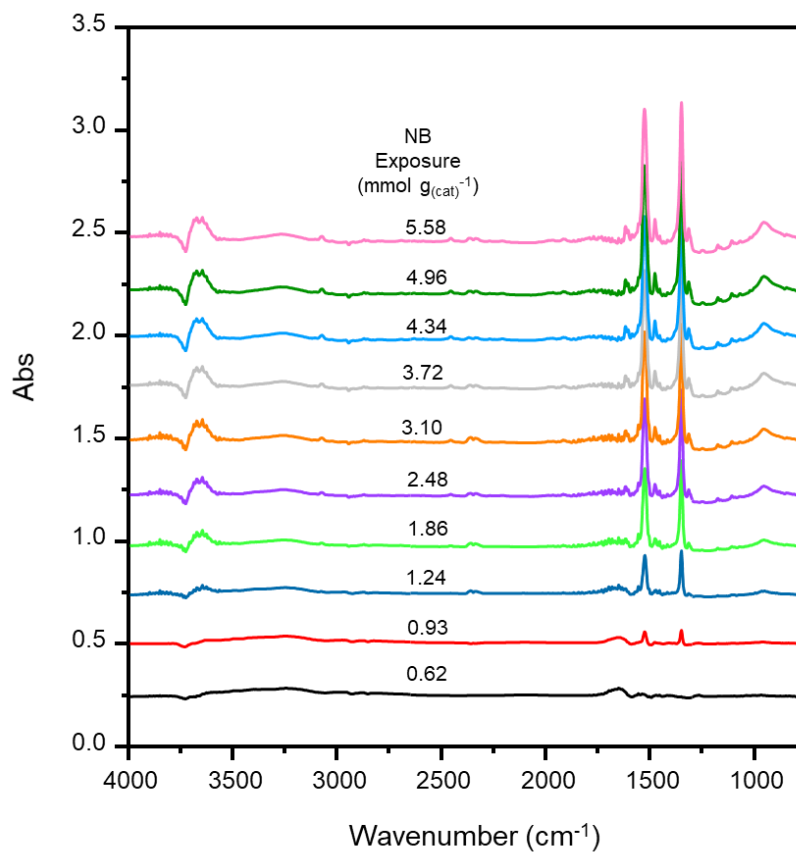

Figure S5. Full wavenumber range DRIFTS spectra depicting increasing nitrobenzene exposure (0.62 – 5.58 mmol<sub>(NB)</sub> g<sub>(cat)</sub><sup>-1</sup>) to GU-1. The spectra have been offset by 0.25 au to facilitate viewing.

## Section S2. Nitrobenzene Registry with Pd(111)

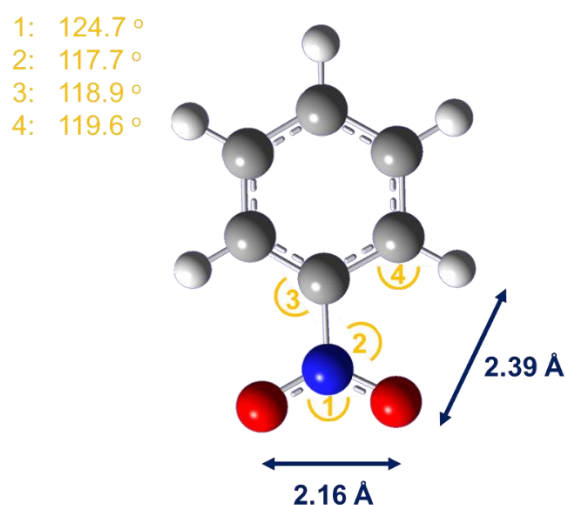

**Figure S6.** Nitrobenzene molecule depicting theoretical intra-atomic distances and bond angles derived using the B3LYP method and 6-11G++(3df.2p) basis set.

This investigation is unable to state an exact tilt angle associated with nitrobenzene adsorption to the catalyst and was not principally focused on ascertaining such. However, consideration of geometrical parameters associated with nitrobenzene and bulk Pd can be used to estimate the positioning of molecular adsorption over Pd(111), the pre-dominant metal surface associated with GU-1 [24], [25]. Literature reports an interatomic Pd-Pd distance of 2.75 Å [49]; from geometrical considerations, this corresponds to distances from the on-top Pd site to the 3-fold hollow site and the adjacent 2-fold hollow to be 1.20 and 2.39 Å, respectively.

The DFT optimised nitrobenzene structure reports distances of 2.16 Å for the two O atoms of the nitro group and 2.39 Å as the distance between one O atom and the closest ortho-H of the aromatic ring, as depicted in Figure S6. The 2.16 Å between the two O atoms of the nitro group does not correspond with the interatomic Pd-Pd (2.75 Å), the on-top Pd to 3-fold hollow site (1.20 Å) or the on-top Pd to 2-fold hollow site (2.39 Å) distances. However, the intra-atomic distance between one O of the nitro group and the closest ortho-H atom (2.39 Å) is coincident with the distance between the on-top and the adjacent 2-fold hollow site. Therefore, we suggest that nitrobenzene adsorbs to the Pd crystallite in a tilted orientation with respect to the molecules yz-plane via two close contacts: (i) the ortho-H atom is in registry with the on-top site, and the O atom is positioned above the adjacent 2-fold hollow site (Fig. S7(a)), or (ii) the O atom is in registry with the on-top site, and the ortho-H is positioned above the adjacent 2-fold hollow site (Fig. S7(b)). Either of these orientational arrangements would act to maximise substrate-adsorbate and adsorbate-adsorbate (via  $\pi$ -stacking) interactions. The specifics of which sites discretely interact with each atom are not known and would benefit from a full DFT

investigation of the adsorption complex; something that is beyond the scope of the current article. Nevertheless, instinctively, it is assumed that option (i), with the O atom located in the 2-fold hollow of the (111) plane, which is depicted in Figure S7, will exhibit the stronger overall interaction with the surface (*i.e.*, high  $T_{\text{desorption}}$ ) as indicated in TP-IR (Fig. 10).

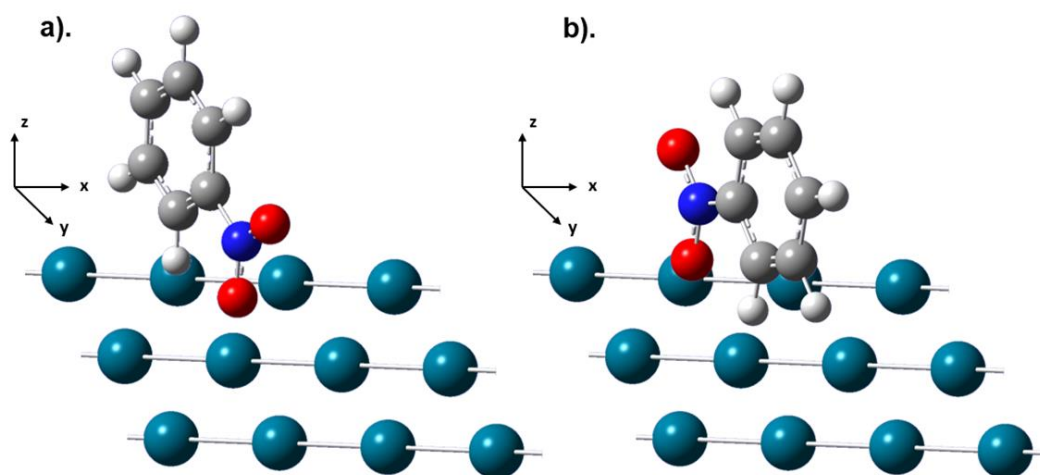

Figure S7. Diagram visualising nitrobenzene adsorption to Pd(111) in a tilted orientation with respect to the yz-plane depicting a). O positioned in a 2-fold hollow site with H in registry with on-top and b). the H positioned in a 2-fold hollow site with O in registry with the on-top site.
